# Supplementary material for: Zr2Si: an antiferromagnetic Dirac MXene
Source: Royal Society of Chemistry journal article supplement (doi:10.1039/c7cp08108a), 2018-01-01
Supplement: c7cp08108a1.pdf [file c7cp08108a1.pdf]

*Supplementary Information for*

**Zr<sub>2</sub>Si: An antiferromagnetic Dirac MXene**

Xiaofei Shao, Xiaobiao Liu, Xiaoming Zhang, Junru Wang, Mingwen Zhao\*

*School of Physics and State Key Laboratory of Crystal Materials, Shandong University, Jinan*

*250100, Shandong, China*

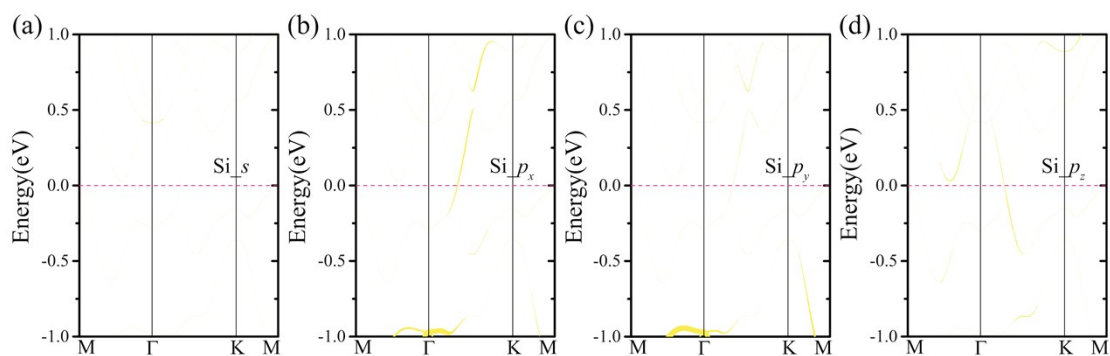

**Figure S1.** The orbital-resolved electronic band structures projected onto the Si of the middle plane.

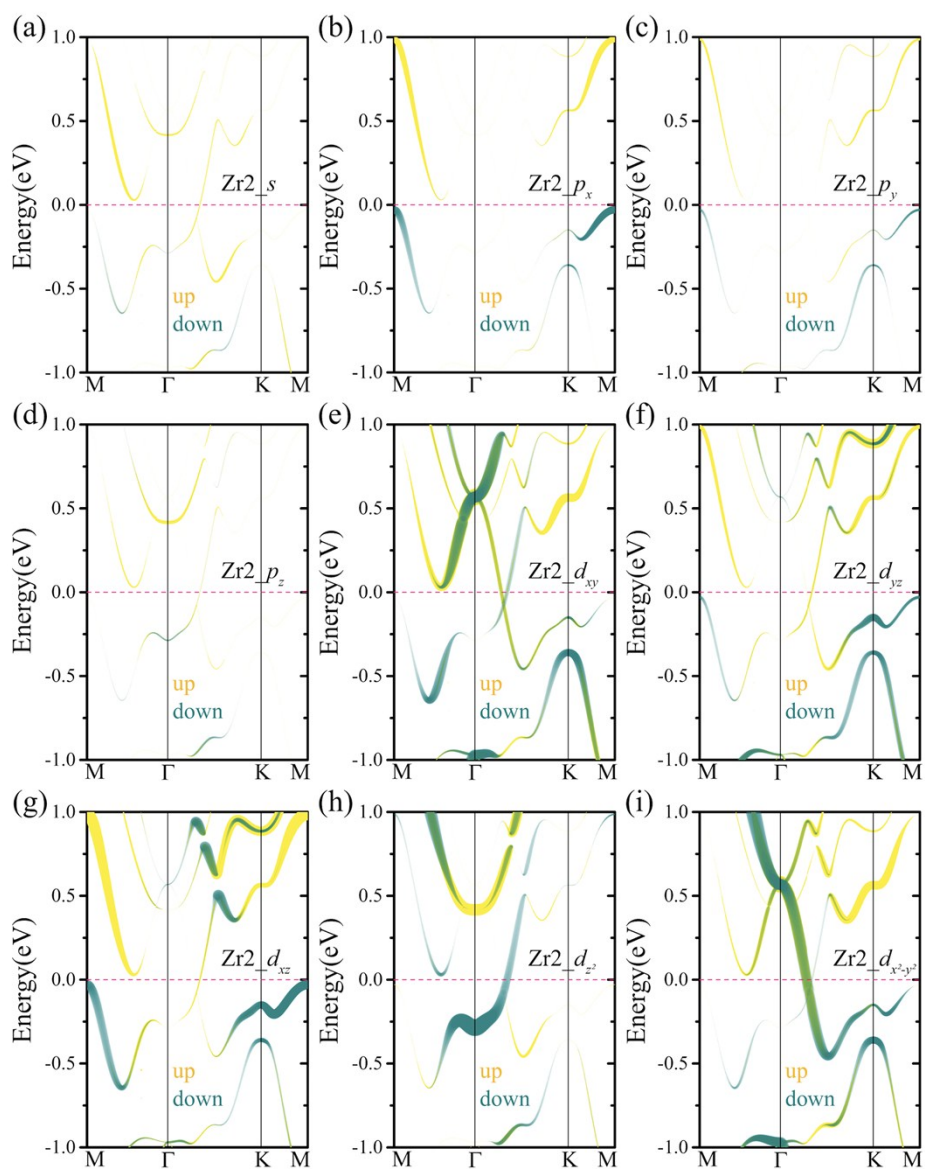

**Figure S2.** The orbital-resolved electronic band structures projected onto the Zr of the down plane (Zr2).

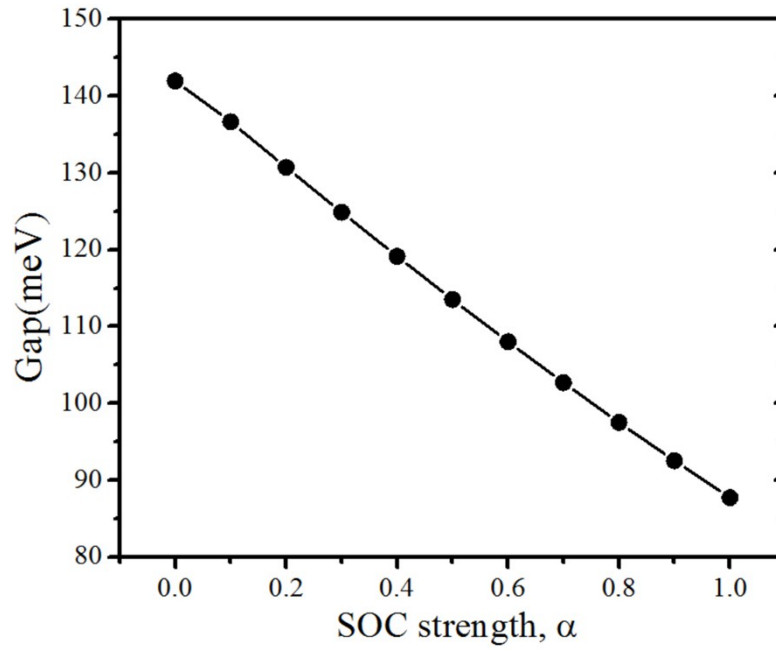

**Figure S3.** Variation of the band gap as a function of strength of spin-orbit coupling (SOC). The strength of SOC is tuned artificially by a factor of  $\alpha$  ( $0 \leq \alpha \leq 1$ ). The SOC is switched off as  $\alpha = 0$ , while  $\alpha = 1$  corresponds to the real SOC strength.  $U = 4.0$  eV was used throughout the calculations.

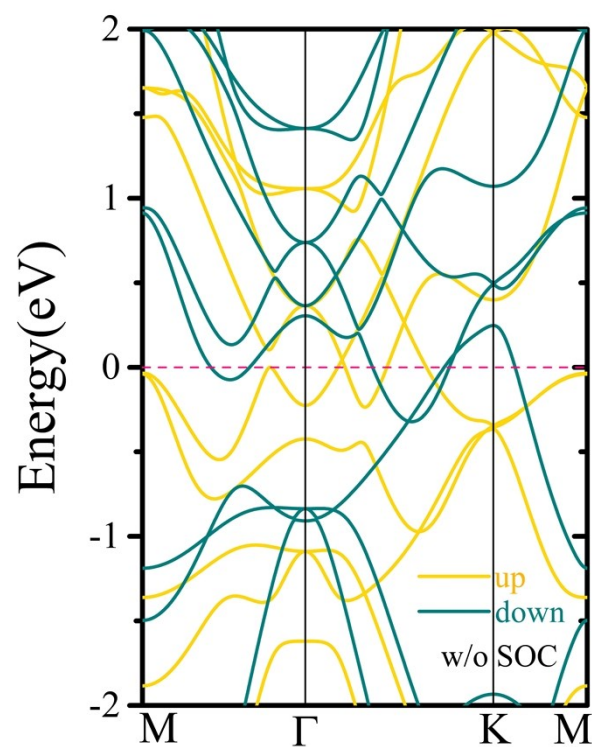

**Figure S4.** Band structure of the ferromagnetic (FM)  $\text{Zr}_2\text{Si}$  calculated without spin-orbit coupling (SOC). The band lines of two spin channels are indicated by yellow (spin up) and blue (spin down) lines. The energy of the Fermi level is set to zero.
